# Supplementary material
Source: PubMed Central journal article supplement (PMC2855785)

**Supplementary Fig. 3. p16 plays an important role in Ras-induced cell senescence and is downregulated in regenerated human tumor tissues.**

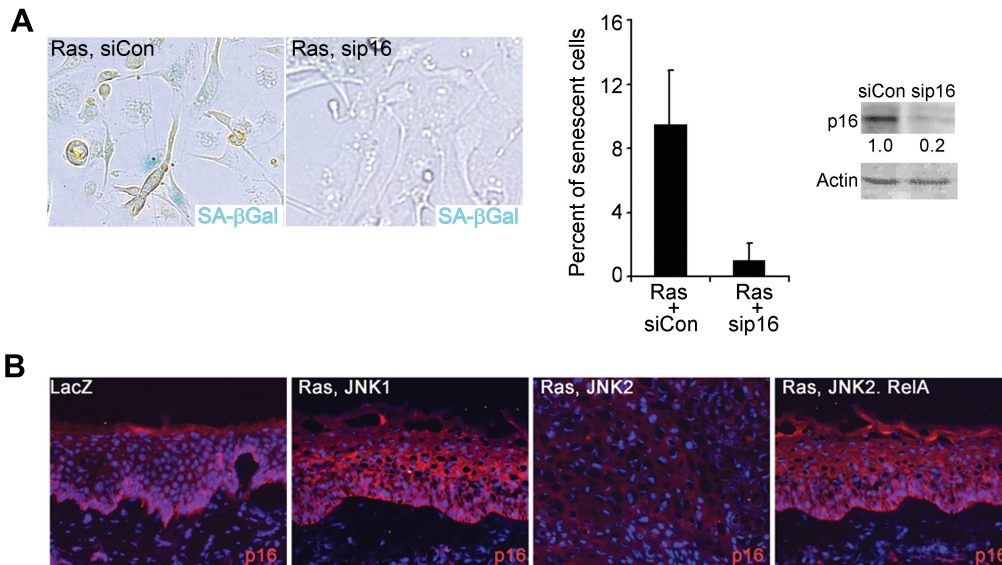

**Supplementary Fig 4. Confirmation of protein expression and JNK inhibition.**

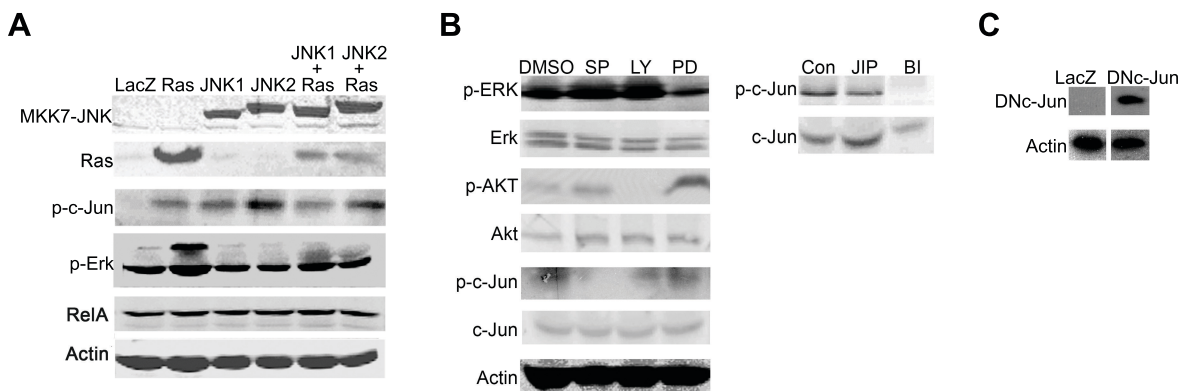

**Supplementary Fig. 5. JNK reduces protein levels of p53.**

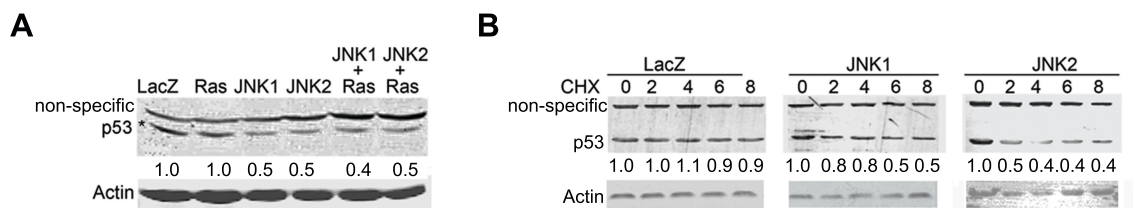

Supplement: NIHMS182094-supplement-2.pdf [file NIHMS182094-supplement-2.pdf]
